# Supplementary material for: Single-cell RNA-sequencing reveals the dynamic process and novel markers in porcine spermatogenesis
Source: PubMed Central journal article supplement (PMC8650533; doi:10.1186/s40104-021-00638-3), 2021-12-07

A

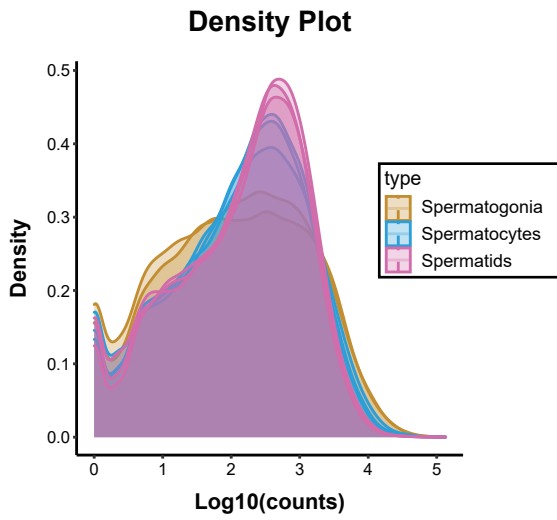

B

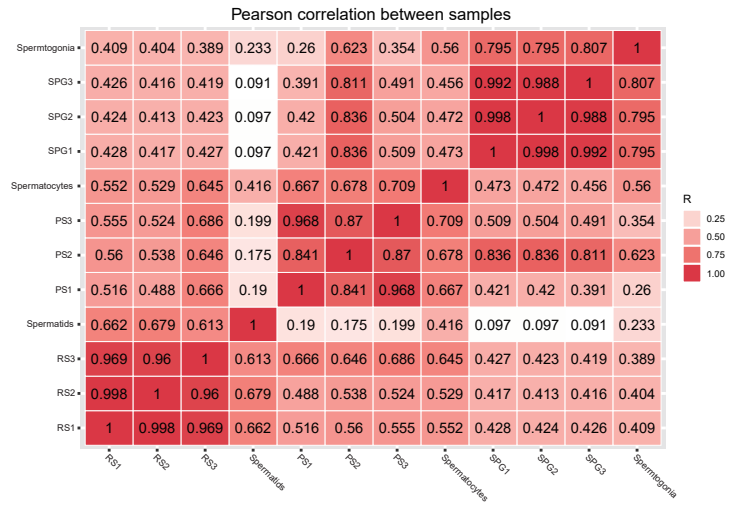

C

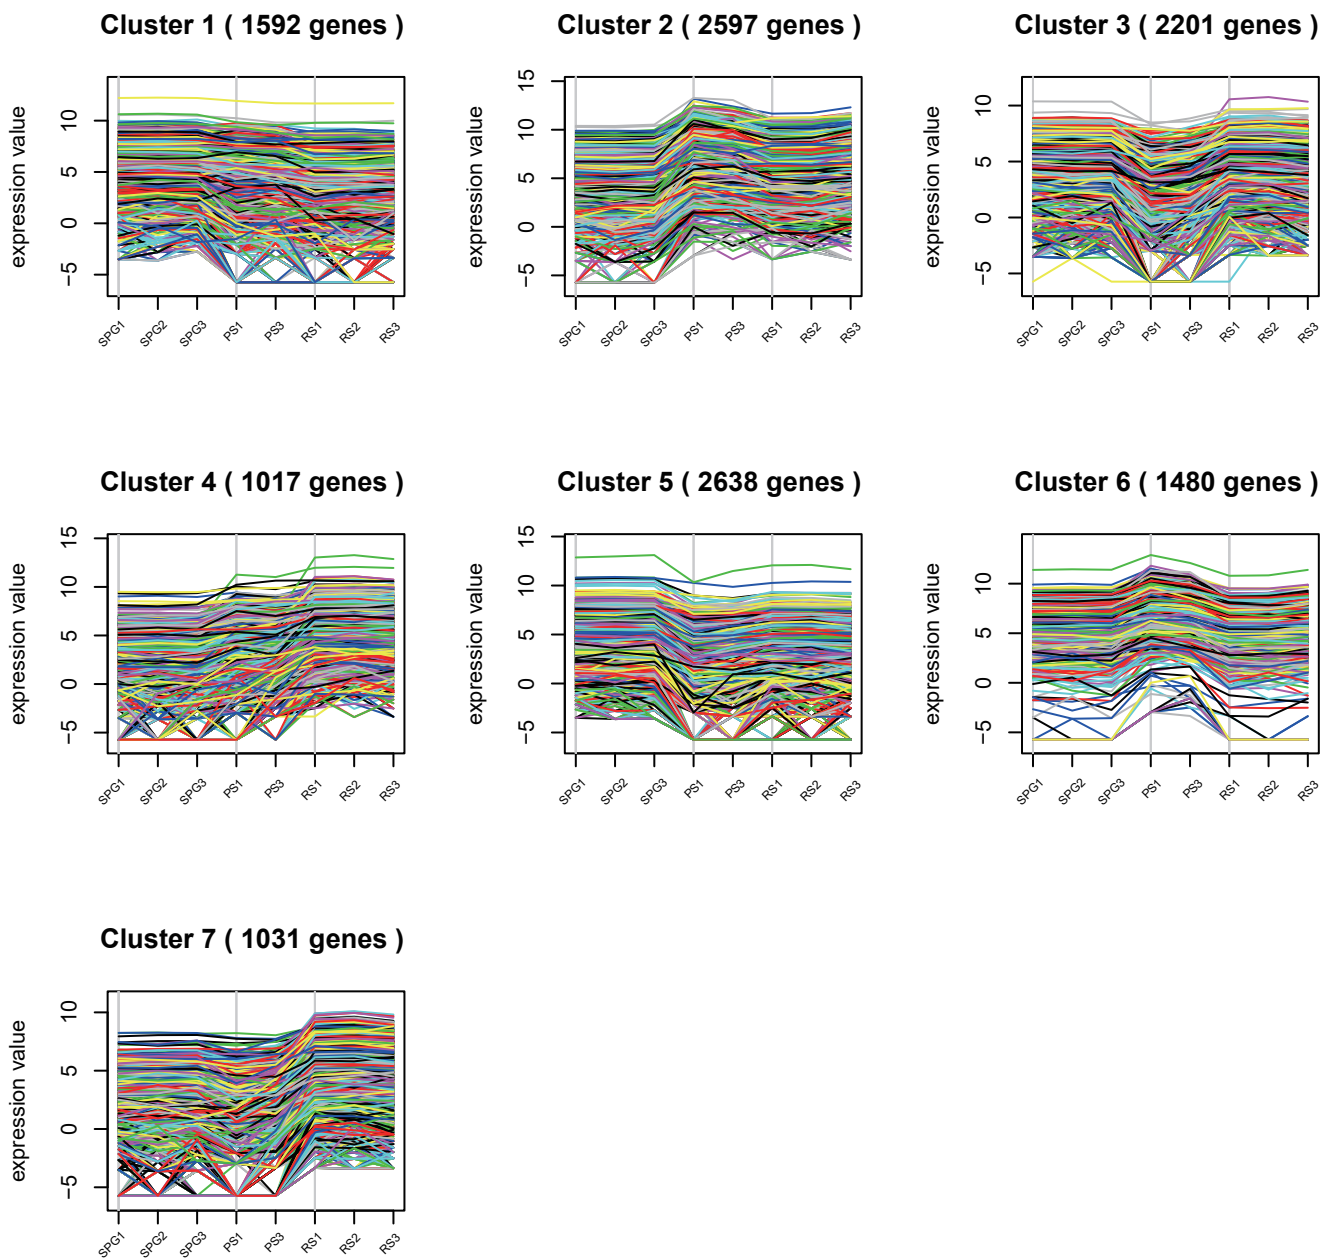

Supplement: 40104_2021_638_MOESM5_ESM.pdf [file 40104_2021_638_MOESM5_ESM.pdf]
